# Supplementary material for: Improved tumor imaging and therapy via i.v. IgG–mediated time-sequential modulation of neonatal Fc receptor
Source: JCI journal article supplement (doi:10.1172/jci32226), 2007-08-25
Supplement: sd1 [file 1]

## SUPPLEMENTARY DATA LEGEND

Supplementary Figure 1: Simplified Actinium-225 decay scheme. The half-lives are shown in italics. Ac-225, Actinium-225; Fr-221, Francium-221; Bi-213, Bismuth-213

Supplementary Table 1: High-dose IgG administration alters the pharmacokinetics of  $^{225}\text{Ac}$ -labeled HuM195 antibody and that of  $^{225}\text{Ac}$  decay elements in mice. Mean difference in organ distribution of  $^{225}\text{Ac}$ ,  $^{221}\text{Fr}$  and  $^{213}\text{Bi}$  activity in IgG-treated versus control mice. Data are mean differences in the percentage of injected dose per gram (% ID/g)  $\pm$  standard error.

Supplementary Table 2: Relative isotope contribution and the total organ absorbed doses (Gy/MBq) in control and IgG-treated mice following administration of  $^{225}\text{Ac}$ -labeled HuM195 antibody.

Supplementary Movie 1: Maximum intensity projection PET scan of representative colon cancer xenograft-bearing mouse at 48 hours following injection with  $^{124}\text{I}$ -labeled A33 antibody. The flank tumor and circulating radiolabeled antibody in heart and major vessels is observed.

Supplementary Movie 2: Maximum intensity projection PET scan of representative IgG-treated colon cancer xenograft-bearing mouse at 48 hours following injection with  $^{124}\text{I}$ -labeled A33 antibody. The mouse received 1g/kg human IgG i.p., 6 hours following  $^{124}\text{I}$ -

A33 injection. As in supplementary movie 1, the flank tumor is well visualized; however, the blood pool activity is significantly lower.

Supplementary Figure 1

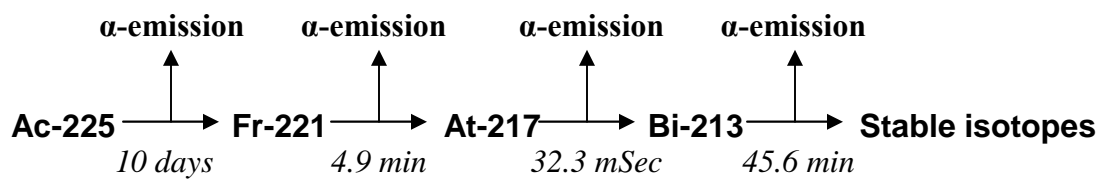

Supplementary Figure 1: Simplified Actinium-225 decay scheme. The half-lives are shown in italics. Ac-225, Actinium-225; Fr-221, Francium-221; Bi-213, Bismuth-213

Supplementary Table 1:

Alteration in the  $^{225}\text{Ac}$ ,  $^{221}\text{Fr}$  and  $^{213}\text{Bi}$  distribution in animals following high-dose IgG therapy

| <i><b>Organ</b></i> | <i><b>Mean Change*</b></i> | <i><b>95% Confidence Interval</b></i> | <i><b>P value</b></i> |
|---------------------|----------------------------|---------------------------------------|-----------------------|
|                     | <b>Actinium-48 hours</b>   |                                       |                       |
| <i>Blood</i>        | 8.967 ± 1.492              | 4.825 to 13.11                        | 0.0039                |
| <i>Kidneys</i>      | 1.533 ± 0.2867             | 0.7373 to 2.329                       | 0.0059                |
| <i>Liver</i>        | -8.133 ± 0.5497            | -9.659 to -6.607                      | 0.0001                |
|                     | <b>Francium-48 hours</b>   |                                       |                       |
| <i>Blood</i>        | 1.357 ± 0.3154             | 0.4811 to 2.232                       | 0.0126                |
| <i>Kidneys</i>      | 11.53 to 22.07             | 16.80 ± 1.900                         | 0.0009                |
| <i>Liver</i>        | -3.900 ± 0.3145            | -4.773 to -3.027                      | 0.0002                |
|                     | <b>Bismuth-48 hours</b>    |                                       |                       |
| <i>Blood</i>        | 0.2033 ± 0.1397            | -0.1844 to 0.5911                     | 0.2192                |
| <i>Kidneys</i>      | 27.23 ± 2.865              | 19.28 to 35.19                        | 0.0007                |
| <i>Liver</i>        | -6.967 ± 0.4137            | -8.115 to -5.818                      | <0.0001               |
|                     | <b>Actinium-120 hours</b>  |                                       |                       |
| <i>Blood</i>        | 13.07 ± 0.6227             | 11.34 to 14.80                        | < 0.0001              |
| <i>Kidneys</i>      | 1.000 ± 0.08165            | 0.7733 to 1.227                       | 0.0003                |
| <i>Liver</i>        | -11.07 ± 0.8807            | -13.51 to -8.622                      | 0.0002                |
|                     | <b>Francium-120 hours</b>  |                                       |                       |
| <i>Blood</i>        | 1.590 ± 0.6537             | -0.2246 to 3.405                      | 0.0718                |
| <i>Kidneys</i>      | 13.43 ± 0.9545             | 10.78 to 16.08                        | 0.0001                |
| <i>Liver</i>        | -5.467 ± 1.008             | -8.264 to -2.669                      | 0.0056                |
|                     | <b>Bismuth-120 hours</b>   |                                       |                       |
| <i>Blood</i>        | 0.2467 ± 0.08340           | 0.01515 to 0.4782                     | 0.0417                |
| <i>Kidneys</i>      | 24.80 ± 0.5437             | 23.29 to 26.31                        | < 0.0001              |
| <i>Liver</i>        | -8.900 ± 0.8615            | -11.29 to -6.508                      | 0.0005                |
|                     | <b>Actinium-192 hours</b>  |                                       |                       |
| <i>Blood</i>        | 9.933 ± 0.9905             | 7.184 to 12.68                        | 0.0006                |
| <i>Kidneys</i>      | 2.900 ± 0.4190             | 1.737 to 4.063                        | 0.0023                |
| <i>Liver</i>        | -5.433 ± 1.951             | -10.85 to -0.1638                     | 0.0496                |
|                     | <b>Francium-192 hours</b>  |                                       |                       |
| <i>Blood</i>        | 2.240 ± 0.4287             | 1.050 to 3.430                        | 0.0064                |
| <i>Kidneys</i>      | 10.73 ± 0.9690             | 8.043 to 13.42                        | 0.0004                |
| <i>Liver</i>        | -2.200 ± 1.089             | -5.223 to 0.8226                      | 0.1134                |
|                     | <b>Bismuth-192 hours</b>   |                                       |                       |
| <i>Blood</i>        | 0.9600 ± 0.1322            | 0.5931 to 1.327                       | 0.0019                |
| <i>Kidneys</i>      | 28.50 ± 3.244              | 19.50 to 37.50                        | 0.0009                |
| <i>Liver</i>        | -4.333 ± 1.503             | -8.505 to -0.1621                     | 0.0448                |

\* expressed as mean difference in the percentage of injected dose per gram

Supplementary Table 2:

Relative isotope contributions and the total organ absorbed doses (Gy/MBq) in Control and IgG-treated mice following administration of  $^{225}\text{Ac}$ -labeled HuM195 antibody

| Tissue  | Control           |                   |                   |                   |        | IgG treated       |                   |                   |                   |       |
|---------|-------------------|-------------------|-------------------|-------------------|--------|-------------------|-------------------|-------------------|-------------------|-------|
|         | $^{225}\text{Ac}$ | $^{221}\text{Fr}$ | $^{217}\text{At}$ | $^{213}\text{Bi}$ | Total  | $^{225}\text{Ac}$ | $^{221}\text{Fr}$ | $^{217}\text{At}$ | $^{213}\text{Bi}$ | Total |
| Blood   | 107.2             | 15.8              | 17.5              | 14.6              | 155.0  | 25.9              | 2.8               | 3.1               | 9.7               | 41.6  |
| Kidneys | 55.5              | 285.0             | 316.7             | 879.8             | 1537.0 | 17.3              | 44.5              | 49.4              | 195.6             | 306.8 |
| Liver   | 100.9             | 60.7              | 67.5              | 128.4             | 357.6  | 198.1             | 111.8             | 124.2             | 244.0             | 678.0 |

Ac-225, Actinium-225; Fr-221, Francium-221; Bi-213, Bismuth-213; Gy, Gray; MBq, Megabecquerel
